# Supplementary material for: Relationship between Item Responses of Negative Affect Items and the Distribution of the Sum of the Item Scores in the General Population
Source: PLoS One. 2016 Nov 2;11(11):e0165928. doi: 10.1371/journal.pone.0165928 (PMC5091904; doi:10.1371/journal.pone.0165928)
Supplement: S1 File — This file includes raw data for distributions of the total depressive symptom scores in Figs 2–7. (XLSX) [file pone.0165928.s001.xlsx]

## Sheet: Fig2,Fig3
	high r group	middle r group	low r group
0	8465	5440	3508
1	3523	3163	2415
2	2289	2355	2016
3	1620	1962	1962
4	1157	1590	1690
5	957	1294	1602
6	732	1110	1409
7	527	848	1257
8	464	760	1130
9	362	582	880
10	234	448	683
11	178	363	552
12	136	298	477
13	98	196	326
14	70	161	271
15	65	112	226
16	42	91	159
17	36	78	129
18	26	56	101
19	19	43	80
20	15	33	50
21	11	22	45
22	5	15	30
23	4	8	20
24	5	12	22

## Sheet: Fig4,Fig5
	high r group	middle high r group	middle low r group	low r group
0	13507	9695	6932	4715
1	3041	3989	3851	3219
2	1751	2509	2909	2965
3	1157	1794	2448	2987
4	679	1179	1811	2500
5	366	730	1077	1681
6	225	490	772	1146
7	123	266	510	737
8	85	190	302	444
9	58	82	202	307
10	17	62	108	159
11	18	30	62	95
12	13	24	56	85

## Sheet: Fig6,Fig7
	high r group	middle high r group	middle low r group	low r group
0	16232	13030	8668	7164
1	2898	3885	5201	4848
2	1147	2110	3544	4946
3	526	1208	1991	2207
4	146	482	939	1085
5	57	194	407	428
6	34	131	290	362
